# Supplementary material for: Astaxantin and Isoflavones Inhibit Benign Prostatic Hyperplasia in Rats by Reducing Oxidative Stress and Normalizing Ca/Mg Balance
Source: MDPI journal article supplement (doi:10.3390/plants10122735), 2021-12-12
Supplement: s1 [file s1]

**Table S1.** Prostatic hyperplasia scoring system (units) for rats. Adopted from Scolnic et al. (1994) with modification.

| Parameter                           | Variant         | Units |
|-------------------------------------|-----------------|-------|
| Low-power magnification (×100)      |                 |       |
| Lumen shape                         | regular         | 1     |
|                                     | villamentous    | 2     |
|                                     | papillary       | 3     |
|                                     | cribnform       | 5     |
| Acinar shape                        | tubular         | 1     |
|                                     | branched        | 3     |
|                                     | irregular       | 5     |
| Interacinar space                   | large           | 1     |
|                                     | moderate        | 3     |
|                                     | back to back    | 5     |
| Stroma                              | fine            | 1     |
|                                     | moderate        | 3     |
|                                     | fibrosis        | 5     |
| High-power magnification (×200-400) |                 |       |
| Epithelial shape                    | flat / cyboidal | 1     |
|                                     | cylindrical     | 3     |
|                                     | hexagonal       | 5     |
| Nuclear shape                       | round           | 1     |
|                                     | small large     | 2     |

|                             |                   |    |
|-----------------------------|-------------------|----|
|                             | irregular         | 5  |
| Mitoses per field (×400)    | absent            | 0  |
|                             | infrequent (1-2)  | 2  |
|                             | abundant (3-5)    | 5  |
|                             | excessive (>6)    | 10 |
| Number of epithelial layers | one               | 1  |
|                             | several (2-3)     | 3  |
|                             | multiple >5       | 5  |
| Incidence                   | focal             | 3  |
|                             | diffuse           | 5  |
| Cell alignment              | polar             | 1  |
|                             | apolar            | 3  |
|                             | penacinar         | 3  |
|                             | piling up         | 3  |
|                             | budding out       | 5  |
|                             | isolated clusters | 5  |
| Inflammatory infiltration   | none              | 0  |
|                             | single cells      | 1  |
|                             | small infiltrates | 3  |
|                             | huge infiltrates  | 5  |
| Total                       |                   |    |
